# Supplementary material for: CRISPR–Cas9 Based Bacteriophage Genome Editing
Source: PubMed Central journal article supplement (PMC9430736; doi:10.1128/spectrum.00820-22), 2022-07-26
Supplement: spectrum.00820-22-s0001.pdf [file spectrum.00820-22-s0001.pdf]

## SUPPLEMENTARY DATA

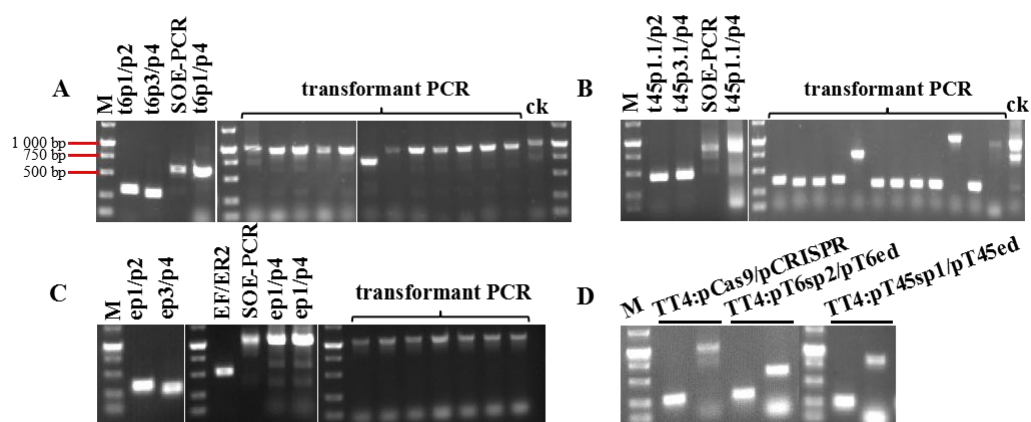

**FIG S1** Construction of strains with recombination template plasmid, or recombination template and targeted plasmids. M is DL5000 DNA Marker. The vertical text in the figure illustrates the primers used in PCR, except for SOE-PCR, which was the result of the second round of SOE-PCR (gene splicing by overlap extension- PCR). (A and B) The construction of TT4::pT6ed and TT4::pT45ed, respectively. The primers used in the PCR of transformants were pCRISPR-F/R. Ck is the result of TT4::pCRISPR amplified with primer pCRISPR-F/R. (C) The construction of TT4::pT6ed-e. Gene *e* was amplified with primers EF/ER2. The primers used for PCR of transformants were ep1/p4. (D) The verification of the strains containing double plasmids. Plasmid pCas9 was verified with primers DR-F/R. pCRISPR, pT6ed and pT45ed were verified with primers pCRISPR-F/R, t6p1/p4 and t45p1.1/p4, respectively.

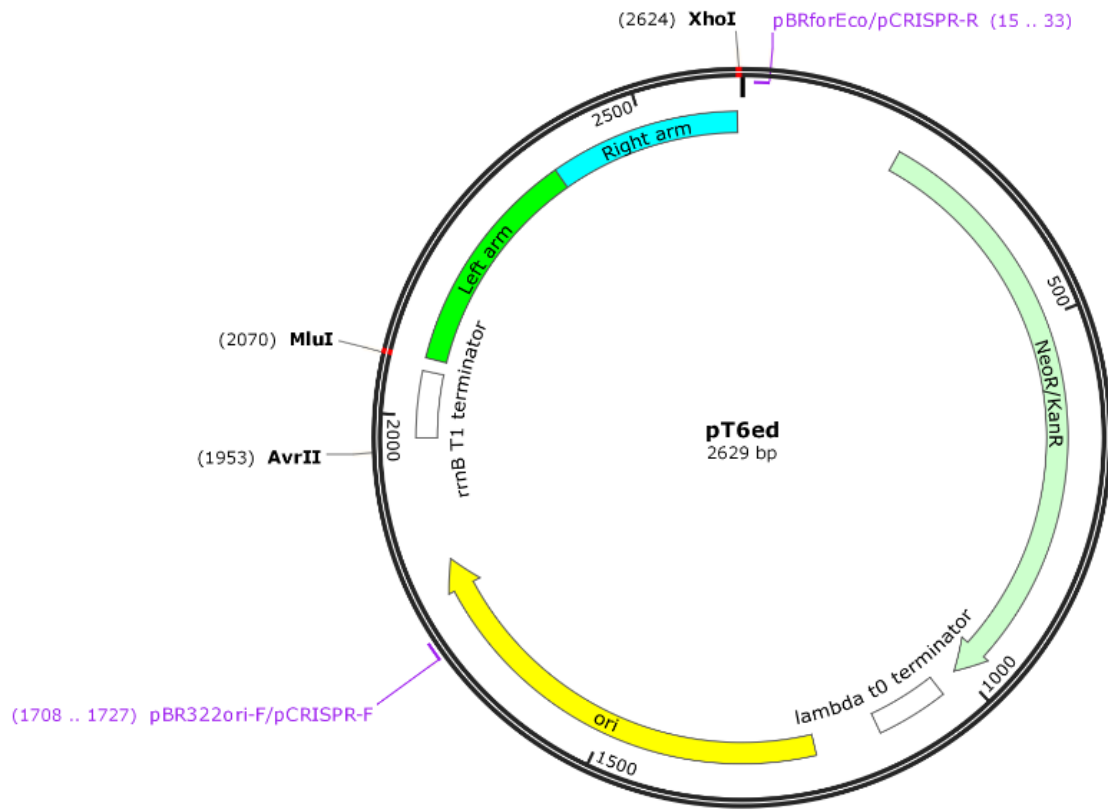

**FIG S2** Map of plasmid pT6ed. The left and the right arm were the gene sequence of phage TT4P2, which can be linked to plasmid pCRISPR after enzyme digestion (*MluI* and *XhoI* marked with red) to construct homologous recombination plasmid pT6ed. The plasmid pT6ed can promote the homologous recombination of phage TT4P2, when performed the deletion of phage TT4P2-*orf6*.

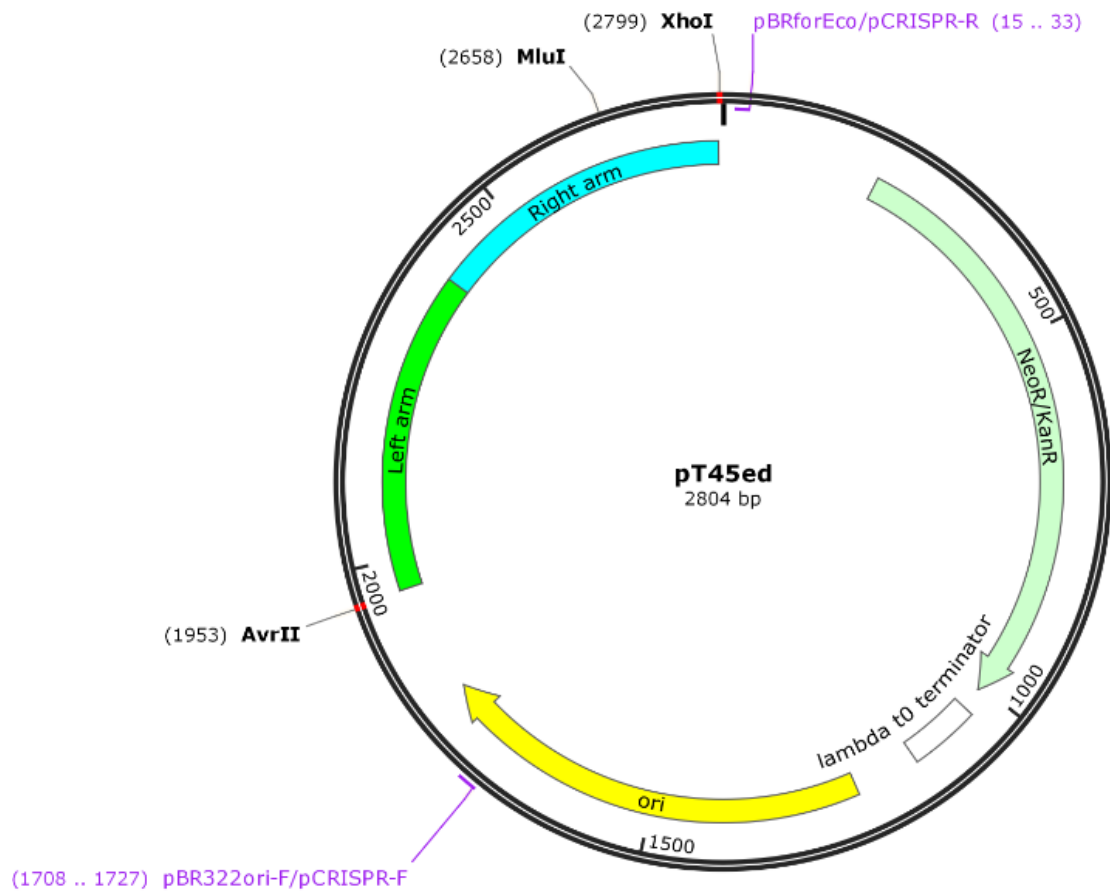

**FIG S3** Map of plasmid pT45ed. The left and the right arm were the gene sequence of phage TT4P2, which can be linked to plasmid pCRISPR after enzyme digestion (*AvrII* and *XhoI* marked with red) to construct homologous recombination plasmid pT45ed. The plasmid pT45ed can promote the homologous recombination of phage TT4P2, when performed the deletion of phage TT4P2-*orf45*.

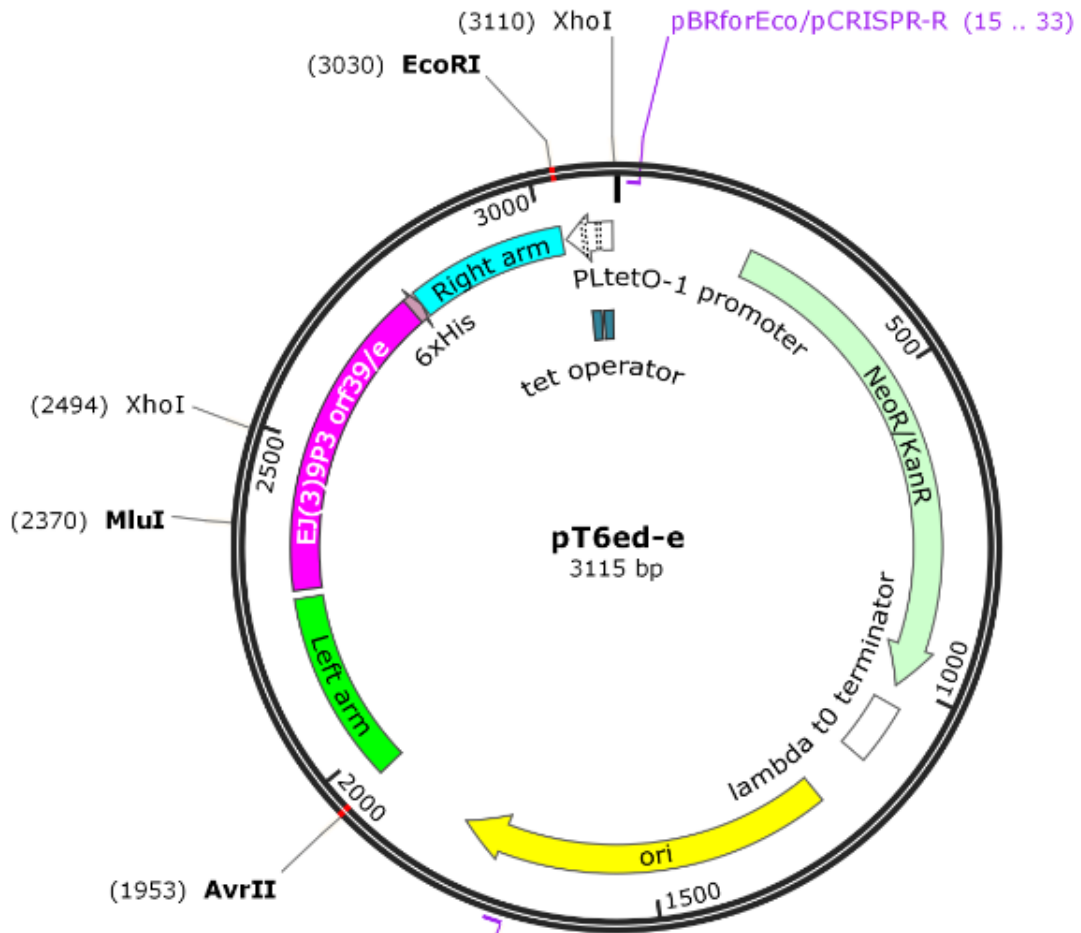

(1708 .. 1727) pBR322ori-F/pCRISPR-F

**FIG S4** Map of plasmid pT6ed-e. The left and the right arm were the gene sequence of phage TT4P2, which can be linked to plasmid pCRISPR after enzyme digestion (*AvrII* and *EcoRI* marked with red) to construct plasmid pT6ed-e. EJ(3)9P3-*orf39* is lysozyme *e*. The plasmid pT6ed-e was used for the gene replacement between TT4P2-*orf6* and EJ(3)9P3-*orf39*.

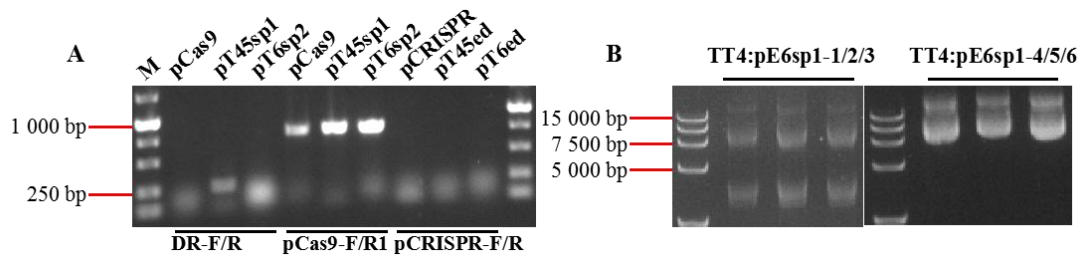

**FIG S5** PCR of bacterial suspensions and extraction of pE6sp1 for plasmid stability Assay. M is DL5000 DNA Marker. (A) PCR results of plasmids were used to verify their stability. The labels below the picture were primers. (B) The extraction of pE6sp1. A sequence in pCas9 was replaced with a spacer1 sequence targeting EH(3)23P1-*orf6* to form plasmid pE6sp1. Plasmids were extracted from TT4::pE6sp1. 1/2/3 were extracted from TT4::pE6sp1, which was taken out at -20 °C and directly subcultured. 4/5/6 were extracted from TT4::pE6sp1, which was taken out at -20 °C and streaking on the plate to picked single colony.

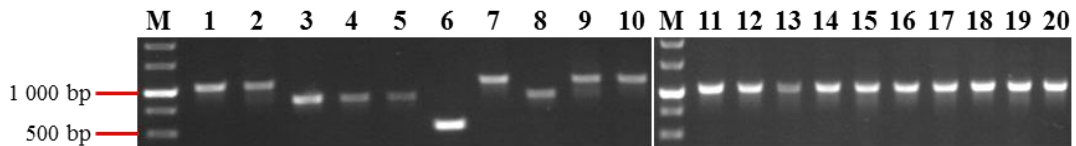

**FIG S6** Replacement of phage TT4P2-*orf6* with lysozyme gene *e* of phage EJ(3)9P3 (*orf39*). M is DL5000 DNA Marker. 1-20 were plaques. The first 10 plaques were picked from TT4::pT6sp2, and the last 10 plaques were picked from TT4::pT6sp1. The plaques of 3, 4, 5 and 8 were wild-type. The plaque of 6 was a nontarget recombinant.

**TABLE 1** Strains used in this study

| Strain                                       | Source or Reference                     |
|----------------------------------------------|-----------------------------------------|
| <i>Vibrio natriegens</i> TT4                 | Preserved in this laboratory            |
| <i>Enterobacter</i> spp. EJ(3)9              | Preserved in this laboratory            |
| <i>Escherichia coli</i> DH5 $\alpha$ ::pCas9 | Addgene                                 |
| <i>E. coli</i> DH5 $\alpha$ ::pCRISPR        | Addgene                                 |
| <i>V. natriegens</i> TT4::pCas9              | TT4 contains plasmid pCas9              |
| <i>V. natriegens</i> TT4::pCRISPR            | TT4 contains plasmid pCRISPR            |
| <i>V. natriegens</i> TT4::pCas9/pCRISPR      | TT4 contains plasmid pCas9 and pCRISPR  |
| <i>V. natriegens</i> TT4::pT6sp1             | TT4 contains plasmid pT6sp1             |
| <i>V. natriegens</i> TT4::pT6sp2             | TT4 contains plasmid pT6sp2             |
| <i>V. natriegens</i> TT4::pT6ed              | TT4 contains plasmid pT6ed              |
| <i>V. natriegens</i> TT4::pT6ed- <i>e</i>    | TT4 contains plasmid pT6ed- <i>e</i>    |
| <i>V. natriegens</i> TT4::pT45sp1            | TT4 contains plasmid pT45sp1            |
| <i>V. natriegens</i> TT4::pT45sp2            | TT4 contains plasmid pT45sp2            |
| <i>V. natriegens</i> TT4::pT45ed             | TT4 contains plasmid pT45ed             |
| <i>V. natriegens</i> TT4::pT6sp2/pT6ed       | TT4 contains plasmid pT6sp2 and pT6ed   |
| <i>V. natriegens</i> TT4::pT45sp1/pT45ed     | TT4 contains plasmid pT45sp1 and pT45ed |
| <i>V. natriegens</i> TT4::pE6sp1             | TT4 contains plasmid pE6sp1             |

Note: In order to select plasmid pCas9 from *E. coli* DH5 $\alpha$ ::pCas9, chloramphenicol was added to medium at a final concentration of 25 $\mu$ g/ml. The selection of plasmid pCRISPR from *E. coli* DH5 $\alpha$ ::pCRISPR was added to medium at a kanamycin final concentration of 50 $\mu$ g/ml. *V. natriegens* phage TT4P2-*orf6* is indicated by T6; TT4P2-*orf6*-spacer is indicated by T6sp, which was connected to plasmid pCas9 to form plasmid pT6sp; TT4P2-*orf6*-editing is indicated by T6ed, which was connected to plasmid pCRISPR to form plasmid pT6ed. The same is as TT4P2-*orf45*.

**TABLE 2** Bacteriophages used in this study

| Bacteriophage                                                        | Source or Reference                                                                                                                                                                                   |
|----------------------------------------------------------------------|-------------------------------------------------------------------------------------------------------------------------------------------------------------------------------------------------------|
| <i>Vibrio natriegens</i> siphophage<br>TT4P2                         | Preserved in this laboratory                                                                                                                                                                          |
| <i>Enterobacter</i> spp. myophage<br>EJ(3)9P3                        | Preserved in this laboratory                                                                                                                                                                          |
| TT4P2 $\Delta$ <i>orf6</i>                                           | TT4P2 <i>orf6</i> deleted 292 bp, constructed in this study                                                                                                                                           |
| TT4P2 $\Delta$ <i>orf5</i> $\Delta$ <i>orf6</i> $\Delta$ <i>orf7</i> | TT4P2 deleted 820 bp, including the entire <i>orf6</i> , 121 bp at the back of <i>orf5</i> , and 182 bp at the front of <i>orf7</i> , constructed in this study                                       |
| TT4P2 $\Delta$ <i>orf6</i> $\Delta$ <i>orf7</i>                      | TT4P2 deleted 347 bp, occurring between two short repeats in the same direction. One of the two repetitive sequences is in <i>orf6</i> , and the latter is in <i>orf7</i> , constructed in this study |
| TT4P2 $\Delta$ <i>orf6</i> :: <i>e</i>                               | The 292 bp of phage TT4P2- <i>orf6</i> was replaced with <i>orf39(e)</i> of phage EJ(3)9P3, constructed in this study                                                                                 |
| TT4P2 $\Delta$ <i>orf45</i>                                          | TT4P2 <i>orf45</i> deleted 162 bp, constructed in this study                                                                                                                                          |

**TABLE 3** Plasmids used in this study

| Plasmid         | Description                                                                                  | Source or Reference |
|-----------------|----------------------------------------------------------------------------------------------|---------------------|
| pCas9           | Low copy, Cam <sup>R</sup> , 9326 bp                                                         | Addgene             |
| pCRISPR         | High copy, Kan <sup>R</sup> , 2707 bp                                                        | Addgene             |
| pT6sp1          | The original sequence in pCas9 was replaced with a spacer (sp1) targeting TT4P2 <i>orf6</i>  | This study          |
| pT6sp2          | The original sequence in pCas9 was replaced with a spacer (sp2) targeting TT4P2 <i>orf6</i>  | This study          |
| pT6ed           | Transformed by pCRISPR to delete 292 bp of TT4P2 <i>orf6</i>                                 | This study          |
| pT6ed- <i>e</i> | Transformed by pCRISPR to replace 292 bp of TT4P2 <i>orf6</i> with EJ(3)9P3- <i>orf39</i>    | This study          |
| pT45sp1         | The original sequence in pCas9 was replaced with a spacer (sp1) targeting TT4P2 <i>orf45</i> | This study          |
| pT45sp2         | The original sequence in pCas9 was replaced with a spacer (sp2) targeting TT4P2 <i>orf45</i> | This study          |
| pT45ed          | Transformed by pCRISPR to delete 162 bp of TT4P2 <i>orf45</i>                                | This study          |

Note: *V. natriegens* phage TT4P2-*orf45* is indicated by T45; TT4P2-*orf45*-spacer is indicated by T45sp, which was connected to plasmid pCas9 to form plasmid pT45sp; TT4P2-*orf45*-editing is indicated by T45ed, which was connected to plasmid pCRISPR to form plasmid pT45ed.

**TABLE 4** Oligos used in this

| <b>Spacer oligo</b> | <b>Sequence (5'-3')</b>                         | <b>Description</b>                                                       |
|---------------------|-------------------------------------------------|--------------------------------------------------------------------------|
| t6oligo-sp1 I       | AAACTAAACGAAAAGCCCGCTATTGAATCC<br><u>GTTAG</u>  | The spacer (sp1) of TT4P2 <i>orf6</i> ;<br>Targeting TT4P2 <i>orf6</i>   |
| t6oligo-sp1 II      | AAAACTAACGGATTCAATAGCGGGCTTTTC<br><u>GTTTA</u>  |                                                                          |
| t6oligo-sp2 I       | AAACCACGTTTTTCGCAGGTTGTAAGATCAA<br><u>CTTAG</u> | The spacer (sp2) of TT4P2 <i>orf6</i> ;<br>Targeting TT4P2 <i>orf6</i>   |
| t6oligo-sp2 II      | AAAACTAAGTTGATCTTACAACCTGCGAAA<br><u>ACGTG</u>  |                                                                          |
| t45oligo-sp1 I      | AAACCGACAAGCTACTAGACCTCGCGAGCC<br><u>GTATG</u>  | The spacer (sp1) of TT4P2<br><i>orf45</i> ; Targeting TT4P2 <i>orf45</i> |
| t45oligo-sp1 II     | AAAACATACGGCTCGCGAGGTCTAGTAGCT<br><u>TGTCCG</u> |                                                                          |
| t45oligo-sp2 I      | AAACCCCATTCGTCCATCGTAGAATACCCC<br><u>TAAAG</u>  | The spacer (sp2) of TT4P2<br><i>orf45</i> ; Targeting TT4P2 <i>orf45</i> |
| t45oligo-sp2 II     | AAAACTTTAGGGGTATTCTACGATGGACGA<br><u>ATGGG</u>  |                                                                          |

Note: The underscore at oligos was the sequence of spacers.



**TABLE 5** Primers used in this

| Primers title         | Sequence (5'-3')                                             | Description                     |
|-----------------------|--------------------------------------------------------------|---------------------------------|
| e1/e_pET_ex_his_1     | ATAGGAGGTCCCATGGACATT                                        | Verified EJ(3)9P3               |
| e2/e_pET_ex_his_2     | AAATGTCGACTAGGTTTTTCATATGC                                   |                                 |
| pBR322ori-F/pCas9-R1  | GGTGATGTCGGCGATATAGG                                         | Verified pCas9                  |
| CAT-R/pCas9-F         | GCAACTGACTGAAATGCCTC                                         |                                 |
| DR-F                  | GCTGAGACAAATAGTGCG                                           | Verified spacer                 |
| DR-R                  | GTATCCGACTGCTGGTATT                                          |                                 |
| pBR322ori-F/pCRISPR-F | GGGAAACGCCTGGTATCTTT                                         | Verified pCRISPR                |
| pBRforEco/pCRISPR-R   | AATAGGCGTATCACGAGGC                                          |                                 |
| t6p1                  | TACG <u>ACGCGT</u> CATGAGACGCTAGGAGAAC                       | Delete TT4P2 <i>orf6</i>        |
| t6p2                  | ATGAGTGATCGAAGTGGG                                           |                                 |
| t6p3                  | <u>CGCCCACTTCGATCACTCATGCTTATCGCGTT</u><br>TACTGG            |                                 |
| t6p4                  | TCTA <u>CTCGAGT</u> CCCTTTAGGTTGGCTTCG                       |                                 |
| t6Y-F                 | TCCCTGAACCTGACACCAG                                          | Verified TT4P2Δ <i>orf6</i>     |
| t6Y-R                 | TTAGGCTCGCACTGTCCCA                                          |                                 |
| ep1                   | TACG <u>CCTAGG</u> CATGAGACGCTAGGAGAAC                       | Replaced TT4P2 <i>orf6</i>      |
| ep2                   | <u>ATGCCAAAAATGTCCATGGGGACCTCCTATA</u><br>TGAGTGATCGAAGTGGG  |                                 |
| ep3                   | <u>TATGAAAACCTACATCATCATCATCATCATG</u><br>CTTATCGCGTTTACTGG  |                                 |
| ep4                   | TCTA <u>GAAATC</u> TCCTTTAGGTTGGCTTCG                        |                                 |
| EF/e1                 | ATAGGAGGTCCCATGGACATT                                        |                                 |
| ER2                   | <u>ATGATGATGATGATGATGTAGGTTTTTCATAT</u><br>GCTTCC            |                                 |
| t45p1.1               | TACG <u>CCTAGG</u> TGAACGCGATTAACACTACGG                     | Delete TT4P2 <i>orf45</i>       |
| t45p2                 | ATCCAGCCTTGATCGTTG                                           |                                 |
| t45p3.1               | <u>CCTGACAGCAACCAACGATCAAGGCTGGAT</u><br>CGATTACTACACGGGCACT |                                 |
| t45p4                 | TCTA <u>CTCGAG</u> CAACGTATGACGCTCCAA                        |                                 |
| t45Y-F                | CGCCAGAAATTAACACGC                                           | Verified<br>TT4P2Δ <i>orf45</i> |
| t45Y-R                | AAGCCCAAACACCCTCAA                                           |                                 |
| TT45-F                | GATGAACTACGCAGGGAT                                           |                                 |
| TT45-R1               | GGTGTGATTGCCATATAAAG                                         |                                 |

Note: The underline at 6 bases was restriction endonuclease cleavage site. The underline at p2/p3 was the complementary sequence in overlap extension PCR. The wavy line at ER2 was tag of 6 × His.
